# Supplementary material
Source: PubMed Central journal article supplement (PMC10485744)
Supplement: jamaoncol-e233309-s003.pdf [file jamaoncol-e233309-s003.pdf]

## Data Sharing Statement

Tachihara. Durvalumab Plus Concurrent Radiotherapy for Treatment of Locally Advanced Non–Small Cell Lung Cancer. *JAMA Oncol*. Published September 07, 2023.  
doi:10.1001/jamaoncol.2023.3309

### Data

**Data available:** Yes

**Data types:** Data (not involving human participants)

#### How to access

**data:** <https://astrazenecagrouptrials.pharmacm.com/ST/Submission/Disclosure>.

**When available:** With publication

### Supporting Documents

**Document types:** Other (please specify)

**Additional Information:** trial protocol

#### How to access

**documents:** <https://astrazenecagrouptrials.pharmacm.com/ST/Submission/Disclosure>.

**When available:** With publication

### Additional Information

**Who can access the data:** researchers requesting the data

**Types of analyses:** for a specified purpose

**Mechanisms of data availability:** with investigator support
